# Supplementary material
Source: publisher site journal article supplement (https://www.degruyter.com/publication/isbn/9783839432952/downloadAsset/9783839432952_Leseprobe.pdf)
Supplement: Supplementary file 1 [file 9783839432952_Leseprobe.pdf]

**Aus:**

*Ulrich Dausendschön-Gay, Elisabeth Gülich, Ulrich Krafft (Hg.)*

## **Ko-Konstruktionen in der Interaktion**

Die gemeinsame Arbeit an Äußerungen  
und anderen sozialen Ereignissen

November 2015, 408 Seiten, kart., zahlr. Abb., 44,99 €, ISBN 978-3-8376-3295-8

In der Interaktionslinguistik und Gesprächsforschung ist das Konzept der Ko-Konstruktion zur Beschreibung von Äußerungen entwickelt worden, die von mehreren Gesprächsteilnehmern gemeinsam formuliert werden. In diesem Band wird dieses Konzept generell erweitert auf soziale Ereignisse, die von den Beteiligten gemeinsam hervorgebracht werden. Hierzu werden neben den klassischen Domänen der Äußerungen und Texte (u.a. auch in mehrsprachigen Settings) auch Datenkollektionen zu multimodalen Aspekten der Interaktion, zu Fragen der (früh-)kindlichen Entwicklung und zu allgemeinen Grundlagen des gemeinsamen Handelns beleuchtet. Die Beiträge diskutieren darüber hinaus theoretische und methodische Probleme des erweiterten Konzepts.

**Ulrich Dausendschön-Gay** war bis 2012 Hochschullehrer für Linguistik an der Universität Bielefeld, lehrte und forschte zu Fragen der mehrsprachigen Kommunikation und des Spracherwerbs in Interaktion.

**Elisabeth Gülich** (Prof. Dr.) arbeitet an der Universität Bielefeld in interdisziplinären Projekten zur Gesprächsforschung, schwerpunktmäßig im medizinischen Bereich.

**Ulrich Krafft** lehrte bis 2008 Französisch und Linguistik an der Universität Bielefeld. Seine Forschungsschwerpunkte sind Phonetik, Phraseologie und Gesprächsforschung.

Weitere Informationen und Bestellung unter:

[www.transcript-verlag.de/978-3-8376-3295-8](http://www.transcript-verlag.de/978-3-8376-3295-8)

# Inhalt

---

**Zu diesem Buch | 7**

## **KO-KONSTRUKTION ALS KONZEPT UND ALS PERSPEKTIVE**

### **Zu einem Konzept von Ko-Konstruktion**

Ulrich Dausendschön-Gay, Elisabeth Gülich, Ulrich Krafft | 21

### **Einige Überlegungen zur Herkunft und zum Anspruch des Konzepts der Ko-Konstruktion**

Jörg Bergmann | 37

### **Positionspapier: Multimodale Interaktionsanalyse**

Reinhold Schmitt | 43

## **KO-KONSTRUKTIONEN IN FORMULIERUNGS- UND TEXTHERSTELLUNGSPROZESSEN**

### **Ko-Konstruktionen im Gespräch:**

#### **Zwischen Kollaboration und Konfrontation**

Susanne Günthner | 55

### **Von Konstruktionen, Ko-Konstruktionen und Rekonstruktionen. Perspektiven auf Formen sprachlich-interaktiven Handelns**

Martina Drescher | 75

### **Methodologische Überlegungen zur Analyse der Sprachenwahl als Ko-Konstruktion**

Georges Lüdi | 97

### **Ko-Konstruktionen in der Schrift. Zur Unterscheidung von Face-to-Face-Interaktion und Textkommunikation am Beispiel des Editierens fremder Beiträge in einem Online-Lernforum**

Heiko Hausendorf, Katrin Lindemann, Emanuel Ruoss,  
Caroline Weininger | 111

### **Die Ko-Konstruktion der Bedeutung in der kollaborativen Übersetzung**

Teresa Tomaszekiewicz | 139

## MULTIMODALE ANALYSEN VON KO-KONSTRUKTIONEN

### **Das Sprechen im Rundfunk als interaktive Montage verschiedener Ressourcen**

Lorenza Mondada | 157

### **Zur Ko-Konstruktion einer amüsanten Unterbrechung während einer argumentativen Auseinandersetzung**

Nikolina Pustički, Reinhold Schmitt | 183

### **Multimodale Ko-Konstruktionen: gestische Lokaldeixis im Bauchraum**

Susanne Uhmann | 209

### **Ko-Konstruktion in der Mensch-Roboter-Interaktion**

Karola Pitsch | 229

### **»Gut, dann such dir mal jemanden für ... dich« Räumliche Konfiguration von sozialen Beziehungen am Beispiel von Familien- und Systemaufstellungen**

Frank Oberzaucher | 259

## DOMÄNENSPEZIFISCHE ANALYSEN VON KO-KONSTRUKTIONEN

### **Ko-Konstruktion in Erwachsenen-Kind-Interaktion: *membership* und der Erwerb von sprachlicher Kompetenz**

Uta Quasthoff | 287

### **Implizites Beziehungswissen – ko-konstruiert**

Ulrich Streeck | 313

### **Ko-Konstruktionen, *alignment* und *interaction intelligence*. Gedanken zum Zusammenhang zwischen Sprache, Kommunikation und Kognition**

Barbara Frank-Job | 325

### **(Ko-?)Konstruktion in institutionellen Settings**

Julia Sacher, Heike Knerich, Beate Lingnau | 349

### **Zur Ko-Konstruktion von Anfallsschilderungen in Arzt-Patienten-Gesprächen**

Elisabeth Gülich, Ulrich Krafft | 373

## AUTORINNEN UND AUTOREN | 401

## Zu diesem Buch

---

ULRICH DAUSENDSCHÖN-GAY, ELISABETH GÜLICH, ULRICH KRAFFT

Besonders einprägsame Beispiele für Phänomene der Hervorbringung von Texten (oder Äußerungen), an der mehr als eine Personen beteiligt ist, finden wir in Situationen, in denen zwei Personen gemeinsam an einer Formulierung arbeiten, die in einen schriftlichen Text Eingang finden soll. So im folgenden Ausschnitt aus einem längeren Gespräch, in dessen Verlauf die beiden Protagonistinnen Sylvia und Birgit einen Teil ihrer gemeinsamen »Sozi-Hausarbeit« herstellen.<sup>1</sup> Der Satz »Der Fragenkatalog für die Interviews wurde in die drei folgenden thematischen Bereiche unterteilt« ist das Ergebnis eines langen Aushandlungsprozesses über fast jeden seiner Bestandteile. Hier ein kurzer Ausschnitt, in dem es um die »thematischen Bereiche« geht, die in diesem Stadium der Texterarbeitung noch »Fragenkomplexe« heißen:

B ((liest vor)) *der fragenkatalog für die interviews wurde in die drei folgenden großen (---) oder übergreifenden*  
S also ich würde würd ganz gern einfach was mit **themen** (-)  
**themen** hm:  
B **thematischen**  
S joa (-) mhm  
B ja das is besser  
S ((liest vor)) *in die drei folgenden ((schreibt)) thematischen (---) bereiche oder was hattest du jetzt,*  
B fragenkomplexe unterteilt;

Mit dieser Art der gemeinsamen Arbeit an einer schriftlichen Formulierung haben wir eine Variante dessen vor uns, was in der jüngeren Forschung zur gesprochenen Sprache allgemein als »Ko-Konstruktion« bezeichnet wird. Etablieren konnte sich dieser Terminus ohne größere Probleme, seit die »construction grammar« in linguistischen und gesprächsanalytischen Kreisen intensiv diskutiert und interaktiv interpretiert wird. Beobachtungen zu den damit beschriebenen Phänomenen liegen natürlich schon länger vor, nur sind sie bislang anders benannt worden, etwa als »collaborative utterances«, als »co-énonciations«, oder als »gemeinsam vervollständigte Äußerungen«.

In den Forschungsprojekten der Herausgeber dieses Buches zu deutsch-französischen Kontaktsituationen haben seit Mitte der 1980er Jahre Beobachtungen zu Ko-Konstruktionen unter verschiedenen Gesichtspunkten eine wichtige Rolle ge-

---

1 Solche und ähnliche Situationen des kollaborativen Schreibens haben uns vor geraumer Zeit in mehreren Projekten beschäftigt. Einige der damaligen Erkenntnisse sind nachzulesen in Dausendschön-Gay/Gülich/Krafft (1992), Krafft/Dausendschön-Gay (1999), Krafft 2005.

spielt.<sup>2</sup> Es bot sich für uns daher an, zu diesem Gegenstandsbereich ein Kolloquium im Zentrum für interdisziplinäre Forschung (ZiF) in Bielefeld zu veranstalten, in dem wir die seinerzeit bearbeiteten Aspekte von Textherstellung noch einmal aus heutiger Sicht, und speziell unter dem Aspekt Ko-Konstruktion, mit Kolleginnen und Kollegen diskutieren wollten, die uns über viele Jahre und manchmal auch Jahrzehnte wissenschaftlich begleitet und wohlwollend unterstützt haben.

Die Diskussionen auf diesem Kolloquium haben eine große Bandbreite teilweise heterogener Aspekte erkennbar gemacht, die sich mit dem Terminus Ko-Konstruktion verbinden lassen. Wir haben uns daher dazu anregen lassen, intensiver darüber nachzudenken, ob nicht ein Konzept vorgeschlagen werden könnte, das die theoretische Klammer für Ansätze aus sehr unterschiedlichen Forschungsbereichen bildet. Das Ergebnis dieser Überlegungen ist im ersten Beitrag des Bandes nachzulesen, in dem wir uns bemühen, gemeinsames Formulieren, gemeinsames Gehen (wie auf dem Deckblatt dieses Bandes) oder gemeinsames Lernen in den konzeptionellen Kontext des »interactional achievement« zu stellen und damit »Ko-Konstruktion« als transdisziplinäres Konzept vorzuschlagen. Der nun vorliegende Band kann als Beleg dafür gelten, dass die Beiträgerinnen und Beiträger mit der Verwendung ihrer je spezifischen Lesart von »Ko-Konstruktion« ihre unterschiedlichen Erkenntnisinteressen gewinnbringend bereichern konnten. Aus der ursprünglichen Heterogenität der Ansätze ist somit im Laufe der Entstehung dieses Bandes eine anregende Vielfalt von Beiträgen innerhalb eines geteilten konzeptionellen Rahmens geworden.

Das Buch hat vier Kapitel, jeweils mit Beiträgen verschiedener Autorinnen und Autoren, die dieser angesprochenen Vielfalt eine thematische Struktur geben.

*Das erste Kapitel* versammelt Beiträge, die sich ausschließlich mit dem Konzept der Ko-Konstruktion beschäftigen; es wird eingeleitet von dem bereits oben erwähnten Versuch der *Herausgeber*, ein weites Konzept von Ko-Konstruktion zu entwerfen, mit dem unterschiedliche analytische Vorgehensweisen und die sie leitenden theoretischen Ansätze erfasst werden. Im Zentrum steht der Vorschlag, Ko-Konstruktion als analytische Perspektive zu sehen, die zusammen mit der bekannten Trias Koorientierung, Koordination und Kooperation geeignet ist, die in ihrer allgemeinen Formulierung sehr plausible, aber analytisch eher etwas unpräzise Theorie des »interactional achievement« zu operationalisieren, also in der konkreten Beschäftigung mit Daten methodisch kontrolliert anwendbar zu machen. Gleichzeitig wollen die Autoren verdeutlichen, dass die Phänomene, die mit »Ko-Konstruktion« bezeichnet werden sollen, auch ohne diesen Terminus und die mit ihm verbundenen Forschungsparadigmen früher schon die Aufmerksamkeit von Forscherinnen und Forschern erweckt haben. Allerdings soll dieser Teil des Aufsatzes nicht als Forschungsüberblick verstanden werden; diesen erhalten interessierte Leserinnen und Leser erst, wenn sie auch die einführenden Bemerkungen anderer AutorInnen des

---

2 Elisabeth Gülich hat für die gemeinsame Arbeit an der Formulierung schon früh den Terminus »*achèvement interactif*« eingeführt (Gülich 1986), Dausendschön-Gay/Krafft (1994) haben die Phänomene unter dem Gesichtspunkte der Erwerbsrelevanz dieser Verfahren ausgewertet und mit dem Konzept des SLASS modelliert.

Bandes gelesen haben, so insbesondere Drescher, Frank-Job, Günthner, sowie Hausendorf et al.

*Reinhold Schmitt* ergänzt diesen ersten Beitrag des rahmenden Kapitels um wesentliche methodische und konzeptionelle Präzisierungen, die sich aus der von ihm vertretenen multimodalen Perspektive innerhalb der Gesprächsforschung ergeben. Seine Überlegungen beruhen auf der intensiven Beschäftigung mit Videodaten und sie erheben den Anspruch, dies mit einem eigenständigen methodologischen Ansatz zu tun, der sich sowohl analytisch als auch konzeptionell von der sprachbasierten (logozentrischen) klassischen Konversationsanalyse unterscheidet. Folgerichtig erläutert er seine Vorschläge an konkreten Beispielen aus Videodaten. Er kann von dort aus eine Reihe von relevanten Aufgaben formulieren, die für die Analyse derartiger Daten im Hinblick auf ko-konstruktive Verfahren berücksichtigt werden sollten. Insofern kann Schmitts Beitrag als eine Ergänzung und Präzisierung des Herausgeberbeitrages vor allem in methodologischer Hinsicht gelten.

*Jörg Bergmann* hingegen setzt sich mit dem Konzept der Ko-Konstruktion in grundlegender Weise kritisch auseinander. Er rekonstruiert die Quellen und entwickelt die theoretischen Zusammenhänge, die in der Ethnomethodologie dazu geführt haben, dass »Konstruktion« als ein nicht-individualistisches Konzept entwickelt worden ist: Es beschreibt die praktischen Leistungen der Teilnehmer an einem sozialen Ereignis, mit dem sie dessen »Geordnetheit« gemeinsam erzeugen. Ko-Konstruktion ist aus dieser Sicht ein überflüssiger Terminus, weil für jede Art der Konstruktion die gemeinsamen Leistungen der Handelnden konstitutiv sind.

In den folgenden drei Kapiteln werden jeweils Beiträge zusammengestellt, die sich thematisch einem übergeordneten Interesse zuordnen lassen.

In *Kapitel 2* werden Ko-Konstruktionen auf der Ebene ihrer verbalen Hervorbringung und der dort zu beobachtenden Verfahren der gemeinsamen Herstellung untersucht. Dies allerdings in sehr verschiedenen medialen Domänen und in divergenten Aktivitätszusammenhängen. Einige Beiträge sind stärker auf grammatische Fragestellungen fokussiert, andere stellen Fragen der Zusammenhänge zwischen medialer Übermittlung und sprachlicher Gestaltung ins Zentrum, wieder andere gehen besonders auf die Bedingungen mehrsprachiger Kommunikation ein. In jedem Fall aber geht es um die funktionale Bedeutung von ko-konstruktiven Verfahren, nicht allein um ihre Beschreibung und Klassifikation.

In mehreren Beiträgen dieses Buches (u. a. Dausendschön-Gay/Gülich/Krafft, Frank-Job) wird neben vielen anderen auch die Frage gestellt, welche Voraussetzungen erfüllt sein müssen, damit es zu beobachtbaren Phänomenen der Ko-Konstruktion kommt. *Susanne Günthner* konzentriert sich auf den Gegenstandsbereich der grammatischen Konstruktionen im Kontext interaktiven Handelns. Dementsprechend referiert ihre Antwort auf die Frage nach den Voraussetzungen auf grundlegende Überlegungen Tomasellos zu gemeinsam fokussierter Aufmerksamkeit, zu Perspektivenübernahme und zu der Fähigkeit zur Interpretation von Handlungsintentionen. Sie kann darlegen, dass dieser interaktionistische Rahmen bestimmend ist für die wesentlichen Forschungsarbeiten zur gemeinsamen Hervorbringung von Äußerungen; in ihrem prägnanten Forschungsbericht dazu ergänzt sie dabei die diesbezüglichen Ausführungen im Beitrag der Herausgeber. Gerade der letzte der von Tomasello ge-

nannten Punkte ist für ihre eigenen Analysen zentral, geht es doch darum zu zeigen, wie und mit welchen konversationellen Konsequenzen unvollständige Äußerungen eines Gesprächspartners von einem anderen so vervollständigt werden, dass die syntaktischen Projektionen zwar erwartungsadäquat erfüllt, die inhaltlichen Projektionen aber gerade in ihr Gegenteil verkehrt werden. Spielerischer Umgang mit diesen Umdeutungen ermöglicht den Beteiligten, dennoch von der Hypothese auszugehen, dass damit ein kollaborativer Beitrag zum Fortgang des Gesprächs gemacht wird; allerdings bergen solche Verfahren der »absichtlichen Fehldeutung« auch ein nicht unerhebliches Konfliktpotential, wenn damit vor allem eigene (argumentative) Interessen verfolgt werden. Susanne Günthner gelingt es auf diese Weise zu verdeutlichen, dass die »Grammatik« der sprachbasierten Ko-Konstruktionen sowohl auf der Ebene der Erfüllung syntaktischer Projektionen als auch auf der Ebene gesprächsrhetorischer Strategien zu verorten ist.

Auch *Martina Drescher* ergänzt den Beitrag der Herausgeber um wichtige Einzelheiten der Forschungssituation im Kontext von Arbeiten zu *constructions* und Ko-Konstruktionen, die in früheren Untersuchungen nicht unter dieser Bezeichnung bearbeitet worden sind. Ihr Fokus liegt dabei auf verbalsprachlichen Aspekten von Äußerungen und Äußerungswiederholungen (Redewiedergaben), denen sie im Analyse-Teil an einem Corpus von Rundfunksendungen nachgeht. Sie unterzieht zunächst das Konzept der Ko-Konstruktion einer kritischen Prüfung. So wie es im Beitrag der Herausgeber definiert wird, als gemeinsames Handeln der Interaktanten auf ein Ziel hin, kommt es dem Schegloffschen *interactional achievement* sehr nahe. Ko-Konstruktion wäre dann ein „grundlegendes, jede Interaktion prägendes Prinzip“ (s. dazu auch Bergmann i.d.Bd). Viel schärfer konturiert wäre das Konzept, wenn man »Konstruktion« im Sinne der Konstruktionsgrammatik verstehen könnte. Es ist aber fraglich, ob und wie sich dieser kognitionslinguistische Begriff in den interaktionslinguistischen Untersuchungsrahmen einpassen lässt. Diese Fragestellung lotet die Autorin im ersten, theoretischen Teil ihres Beitrags aus. Gegenstand des zweiten, empirischen Teils ist eine Sendung aus dem kamerunischen Rundfunk, in der Hörer ihre Probleme darstellen und Rat suchen. Analysiert werden insbesondere Zuhöreraktivitäten, Formulierungsroutinen und die Rekonstruktion der Problemdarstellung. Die Verfasserin stellt das Konzept einer zeitlich gestreckten Ko-Konstruktion zur Diskussion. Belegfälle wären die Emergenz von Formulierungsroutinen und die bei der Rekonstruktion fremder Rede beobachtbare Polyphonie.

Am Beispiel des Gesprächs zwischen einer Portugiesischen Patientin und einem deutschsprachigen Arzt entwickelt *Georges Lüdi* die sehr komplexe Fragestellung, wie es den beiden Protagonisten gelingt, die Beschreibung von Symptomen gemeinsam zu erarbeiten, obgleich beide über keine gemeinsame Kommunikationssprache verfügen. Das Sachproblem ähnelt dem, das im Beitrag von Elisabeth Gülich und Ulrich Krafft Gegenstand der Untersuchung ist, nämlich der kollaborativen Erarbeitung der Beschreibung einer körperlichen/psychischen Beschwerde, für die aus verschiedenen Gründen die sprachlichen Darstellungsmittel erst erarbeitet werden müssen. Georges Lüdi interessiert sich dabei vorrangig für die Verfahren der Sprachenwahl, die dann bei der gemeinsamen Formulierung eines Sachverhalts zum Problem wird, wenn von einer »extremen exolingual-mehrsprachigen Situation« gesprochen werden kann. Insofern kann sowohl auf der Ebene der Symptombeschreibung als auch auf der Ebene der Mobilisierung mehrsprachiger Ressourcen durch die Gesprächsteil-

nehmer von Ko-Konstruktionen gesprochen werden. Lüdís Beitrag schärft den Blick dafür, dass zu den Bedingungen gemeinsamen Formulierens auch die Bereitstellung und/oder Erarbeitung sprachlich-kommunikativer Grundvoraussetzungen gehören, die in endolingual-einsprachigen Settings nicht in den analytischen Fokus geraten, weil die Gesprächsteilnehmer sie als unproblematisch behandeln. Lüdi reichert seine Analysen zu Gesprächsdaten mit Ausschnitten aus Interviews mit Personen an, die sich zu ihren Praktiken der mehrsprachigen Rede äußern; der Methodenmix aus Gesprächsanalyse und Diskursanalyse ist geeignet, genauere Erkenntnisse zu den untersuchten Phänomenen zu gewinnen.

*Hausendorf et al.* definieren Ko-konstruktion als das Fortführen einer nicht beendeten Redeeinheit durch einen anderen Sprecher, so dass eine von zwei (oder mehr) Sprechern kokonstruierte Redeeinheit entsteht (zu dieser engen Definition von Ko-konstruktion vgl. auch Günthner, Drescher). Die so verstandene Ko-konstruktion ist an die Ko-Präsenz der Partner in der Interaktion gebunden und ist damit ein Phänomen der mündlichen Kommunikation. Ein konstitutives Merkmal schriftlicher Kommunikation ist dagegen die strenge Trennung von Schreiber und Leser: Der Schreiber kann nicht einmal wissen, ob das, was er schreibt, gelesen wird, und der Leser hat keine Möglichkeit, ins Schreiben einzugreifen. Bedingung der Kommunikation ist hier nicht Kopräsenz, sondern Lesbarkeit. Somit kann es in der schriftlichen Kommunikation keine Ko-konstruktion im Sinne der mündlichen Kommunikation geben. Nun bieten aber die elektronischen Medien neue Möglichkeiten der Zusammenarbeit. Zunächst bildet etwa E-Mail-Kommunikation die Brief-Kommunikation ab: Es ist ein Folge von Texten, die jeweils eindeutig einem Autoren zugeordnet sind und die auf Lektüre und Antwort warten. Es gibt aber auch Systeme, in denen es möglich ist, ein eigenes oder fremdes Posting zu „editieren“, d.h., es nachträglich zu verändern, ohne dass diese Veränderung vom System kenntlich gemacht würde. Es entsteht ein neuer Text, aus dem nicht zu ersehen ist, wie der ursprüngliche Text lautete und wer wo womit eingegriffen hat. Diese Veränderungen geschehen auf ein gemeinsames Ziel hin (im analysierten Beispiel geht es darum, eine Entscheidung zu treffen). Daher sprechen die Verfasser von einer „Verdichtung“ der Texte, und sie sehen hier einen „Kandidaten“ für eine Ko-Konstruktion in der Schrift: ein besonderes Verfahren der schriftlichen Kommunikation, mit dem zwei oder mehrere Schreiber ein gemeinsames Ziel verfolgen.

Übersetzen ist, genau wie Schreiben, eine einsame Tätigkeit, es sei denn, man bittet mehrere Übersetzer, einen Text in Zusammenarbeit zu übersetzen. In einer solchen »kollaborativen Übersetzung« werden die TeilnehmerInnen die einzelnen Arbeitsschritte für und mit ihren PartnerInnen laut vollziehen, sie bei Gelegenheit auch diskutieren. Sie dokumentieren ihre Arbeit, so dass man den Übersetzungsprozess rekonstruieren kann. Diese Rekonstruktion ist das erste Interesse von *Teresa Tomszkiewicz*. Sie beobachtet minutiös, wie 2 Dyaden von Übersetzerinnen einen Französischen Text ins Polnische bringen. Wie erhofft diskutieren die Übersetzerinnen ihr Vorgehen und helfen sich gegenseitig beim Verstehen des schwierigen Ausgangstextes und beim Formulieren des Zieltextes, der damit als Ergebnis einer Ko-konstruktion erscheint. Verf. unterscheidet verschiedene Arbeitsphasen, in denen die Probanden spezifische Verfahren anwenden. Besonders schwer zu fassen, in diesen Interaktionen aber deutlich identifizierbar ist die Phase der Deverbalisierung, der geheimnisvolle Übergang vom Verstehen zum Formulieren. Ein zweiter Schwerpunkt

der Beobachtungen und Überlegungen gilt dem Unterschied zwischen den beiden Übersetzerinnen-Dyaden, fortgeschrittene Studentinnen und professionellen Übersetzerinnen. Der Vergleich zeigt, welche Kompetenzen zu entwickeln sind und legt damit Konsequenzen für die Didaktik der Übersetzung nahe.

In *Kapitel 3* stehen nach den medialen Aspekten des vorangehenden Kapitels nunmehr multimodale Analysegesichtspunkt im Mittelpunkt des Interesses. Dies führt dazu, dass sprachliche Verfahren teilweise in den Hintergrund treten und Zeigeaktionen, Körperkoordinierungen oder mimisch-gestische Beschreibungsaspekte als gleichberechtigte Ressourcen konzipiert und analysiert werden. Für das Konzept der Ko-Konstruktion bzw. des Ko-Konstruierens bedeutet dies, dass es nicht mehr ausschließlich die gemeinsame Formulierungsarbeit der Beteiligten modelliert, sondern alle Formen des gemeinsamen Handelns einschließt, sofern die Koproduzenten ihre Orientierung auf ein anzustrebendes Ziel der Interaktion sich gegenseitig erkennbar machen.

*Lorenza Mondada* untersucht Ausschnitte aus einer Rundfunksendung, einer Magazinsendung mit zwei Moderatoren zum Thema »Coming out«. Was der Radiohörer als zwangloses Gespräch zwischen den Moderatoren und wechselnden Interviewpartnern wahrnimmt, ist in Wirklichkeit Ergebnis eines komplexen Prozesses, in dem die Moderatoren, während Musik gespielt wird, die folgende Anmoderation interaktiv konstruieren. Dabei nutzen sie, wie die Video-Aufnahmen aus dem Studio zeigen, vielfältige Ressourcen: von der Redaktion bereitgestellte Texte, das Internet, Ideen, die sie im Dialog äußern, weiterentwickeln werden und notieren, Musik, die gerade gespielt wird, das vorproduzierte Interview. Sie kommen so zu einem gemeinsamen Entwurf der Anmoderation, den sie mit professioneller »Spontaneität« dialogisch umsetzen, wobei sie sich mimisch und gestisch über den Ablauf verständigen und in den sie auch das vorproduzierte Interview einbinden. Die Verfasserin rekonstruiert die Kokonstruktionsprozesse und widmet sich dabei insbesondere dem Konzept der »Ressource«: Ressourcen finden sich nicht als solche vor; vielmehr können die Interaktanten neben Texten und sprachlichen Fragmenten alle Elemente ihrer Umgebung und ihren eignen Körper (Mimik, Gestik) für die Konstruktion des Produkts nutzen und damit zur Ressource machen.

Das Erkenntnisinteresse, mit dem Ko-Konstruktionen in den Fokus der multimodalen Interaktionsanalyse genommen werden, so präzisieren *Nikolina Pustički und Reinhold Schmitt* in ihrem Beitrag, sucht nach der spezifischen Art der sozialen Beziehung, die mit ihrer Hilfe zwischen Beteiligten hergestellt und angezeigt werden, nämlich die Beteiligung an einem gemeinsamen Projekt und »die kollektive Relevantsetzung thematischer oder pragmatischer Aspekte« (Schmitt, i.d.Bd.:13). An kokonstruierten Äußerungen lässt sich das gut darstellen, wie das vorige Kapitel gezeigt hat. Ereignisse mit geringer oder gänzlich abwesender Bedeutung verbalsprachlicher Elemente für das Zustandekommen der Sinnkonstruktion hingegen stellen eine zusätzliche Herausforderung dar, weil sie das Zusammenspiel der diversen symbolischen Ressourcen analytisch fassen und interpretativ auswerten müssen. Mit diesem Anspruch können die Verfasser die Unterbrechung eines Konfliktgesprächs zwischen einem Ausbilder und vier Auszubildenden durch einen hinzukommenden Kollegen schrittweise auf verschiedenen Ebenen untersuchen. Sie können zeigen, dass und wie

eine personelle Konstellation allmählich instabil wird, eine neue Konstellation parallel dazu »emergiert«, und die zunächst gebildete Gesprächsgruppe sich nach und nach vollständig in die neue Situation integriert. Allerdings nur kurzfristig und vorübergehend, denn ganz im Sinne einer klassischen »Nebensequenz« beenden die Beteiligten die Unterbrechung, indem sie in die Ausgangssituation zurückkehren und die argumentative Auseinandersetzung des Konfliktgesprächs an der Stelle fortsetzen, an der sie es vorher verlassen hatten. Der Unterbrecher, der unfreiwillig Gegenstand und Akteur einer spaßigen Vergesellschaftungssequenz geworden ist, verlässt indes den Ort des Geschehens und geht seiner Wege. Die soziale Qualität dieses ko-konstruierten Ereignisses liegt für die Gruppe in der Möglichkeit, den aktuellen Konflikt durch die sich zufällig ergebende gemeinsame Belustigung zu entschärfen, ohne dabei den Kern der Auseinandersetzung zu berühren; es geht also nicht um die Bearbeitung der ausgetauschten Argumentationen, sondern um die Herstellung und Bestätigung einer spezifischen Qualität der sozialen Beziehung zwischen den Akteuren. Der Ablauf des Geschehens ist gleichzeitig geeignet, die hierarchischen Beziehungen in der Gruppe erkennbar zu machen (aus der Sicht der Analytiker) bzw. zu reproduzieren (aus der Sicht der Beteiligten). So kann der Beitrag von Schmitt/Pustički den Anspruch einlösen, die soziale Dimension des Konzepts der Ko-Konstruktionen herauszuarbeiten und es damit deutlich zu erweitern.

Prototypische Beispiele von Ko-Konstruktionen im engeren Sinne sind zweifellos die von Harvey Sacks so genannten »collaboratively built sentences«, auf die in vielen Beiträgen vor allem des zweiten Kapitels referiert wird. *Susanne Uhmann* plädiert in ihrem Beitrag dafür, auch multimodal komplexe kommunikative Gestalten, die aus verbalen und nicht-verbalen Anteilen in je spezifischer Zusammensetzung bestehen, als gemeinsam produzierte Einheiten in diesem Sinne zu verstehen. Theoretisch fundiert sie dies in einer kritischen und eigenständigen Auseinandersetzung mit dem multimodalen Ansatz der Interaktionsanalyse im Kontext der Beschäftigung mit *Studies of Work*. Analytisch plausibilisiert sie ihren Ansatz an Videomaterialien aus dem Operationsaal, die während laparoskopischer Eingriffe entstanden sind. Die speziellen Bedingungen der Koorientierung und der gegenseitigen Beobachtbarkeit der Beteiligten bringen es mit sich, dass sprachliche Deixis vom Typ »da« und »hier« nur im Zusammenhang mit Zeigegesten »im Bauchraum« desambiguiert werden kann; die Zeigegesten werden dabei mit multifunktional einsetzbaren OP-Instrumenten vorgenommen, die als semiotische Ressourcen im Zusammenhang einer »social practice« eingesetzt werden. Uhmann kann deutlich machen, dass verbale und gestische Züge so sequenziell organisiert werden, dass sie insgesamt die Aufgabe der Lokaldeixis übernehmen und dies in einer Weise, für die das Konzept der Ko-Konstruktion einen geeigneten deskriptiven Rahmen bereitstellt. Der Beitrag komplettiert die Arbeiten zur multimodalen Analyse um den in dieser Weise wenig bearbeiteten Gegenstand der Lokaldeixis, und dies an Daten aus einer Arbeitssituation, die von extremen Einschränkungen der alltäglich zur Verfügung stehenden Möglichkeiten der Organisation des »interactional achievement« gekennzeichnet ist.

Die Daten, die als Grundlage des Beitrages von *Karola Pitsch* dienen, unterliegen ebenfalls starken kommunikativen Einschränkungen; hier jedoch wegen der nur unvollständig entwickelten Handlungskompetenz eines der Beteiligten. Der Roboter NAO soll Museumsbesuchern Erklärungen über Kunstwerke anbieten, die sich an den Wänden des Raums befinden, in dem Nao gut sichtbar installiert ist. Er wendet

sich erst dann an Besucher, wenn sie in seinem engeren Blickfeld auftauchen und wenn er ihr Verhalten als kommunikationsbereit interpretiert. Er übernimmt dann die Initiative zur Gesprächseröffnung, alle folgenden Aktivitäten seinerseits sind aber wesentlich durch die Programmierung vorgeplant und emergieren nicht aus den spezifischen Bedingungen des jeweiligen Settings, das sich mit jeder Besucherin verändert. Für die vergleichenden Analyse verschiedener Datenstücke aus dem Korpus versteht die Autorin den kommunikativen Austausch zwischen Menschen und Roboter als Interaktionssystem, für dessen Verständnis es vor allem darum geht, die Beiträge der Beteiligten in ihrem funktionalen Wert für das Zustandekommen einer Verständigung zu erfassen. Dies kann vor allem am Beginn einer Interaktion deutlich gemacht werden, in deren Verlauf die menschlichen Partner Hypothesen über die Handlungskompetenzen NAOs entwickeln und ihr eigenes Verhalten darauf abstellen. Es erweist sich, dass die Beschäftigung mit dieser Art von Daten unter der Perspektive der gemeinsamen sozialen Praxis eine interessante Herausforderung für die Interaktionsanalyse darstellt, vor allem im Hinblick auf die Organisation von Anschlussersparungen und Anschlussaktionen. Dabei scheinen kommunikative Vorerfahrungen der menschlichen Beteiligten mit »Brechungen der Handlungslogik« eine wichtige Rolle zu spielen. Für die Forschungen zur Mensch-Roboter-Interaktion bietet es sich an, nicht die »Defizite« des Roboters durch angemessene Implementierungen zu beseitigen, sondern auch Bedingungen herzustellen, unter denen am Beginn des kommunikativen Austausches die Art und die Qualität seiner möglichen Beiträge zum interaktiven Geschehen erkannt und berücksichtigt werden können.

In den Daten aus psychotherapeutischen Gesprächen, die in den Beiträgen von Sacher et al. und von Gülich/Krafft analysiert werden, erarbeiten die Beteiligten Äußerungen und komplexe Darstellungen wesentlich auf der sprachlichen Ebene und stellen sie sich gegenseitig für die weitere Behandlung zur Verfügung. In den Familienaufstellungen, die im Beitrag von *Frank Oberzaucher* zum Gegenstand gemacht werden, wird hingegen die Positionierung von Personen im Raum zur Darstellung von (Problemen in) sozialen Beziehungen ko-konstruiert; sie ist das Ziel eines Teils des interaktiven Geschehens, und gleichzeitig Grundlage für die weiteren Schritte einer möglichen Behandlung. Damit wird eine der Grundmodalitäten interaktiven Handelns aus dem multimodalen Setting isoliert und die analytische Bearbeitung in besonderer Weise zugänglich. Oberzaucher verfolgt in seiner Darstellung das Geschehen in einer Aufstellung in den wesentlichen Schritten (Formulieren des Anliegens, Wahl der Stellvertreter, Positionierung, Rollenverteilung und Auswertung des Rollenspiels) und arbeitet dabei vor allem den für die Methode spezifischen Wechsel von sprachorientierten und sprachfreien Phasen heraus, in denen die körper- und raumbezogenen Modalitäten Sinn erzeugende Funktionen verstärkt übernehmen. Auch in diesem stark konventionalisierten und durch die methodischen Prinzipien der Aufstellung »überformten« Setting kann gezeigt werden, dass die Perspektive der Ko-Konstruktion wesentliche Orientierungen der Beteiligten analytisch rekonstruierbar macht. Eine zusätzliche Fokussierung auf den Aufstellungsleiter kann darüber hinaus Aspekte des professionellen Handelns und der notwendigen Kompetenzen in den Blick nehmen, die auch im Beitrag von Uhmans durch die Hinweise auf die »community of practice« im Operationssaal thematisiert wurden. Die ungleiche Verteilung der Kompetenzen für die Durchführung der Aufstellung und die verschiedenen Typen von Expertise machen dieses Setting zu einem besonders interessanten

Untersuchungsfeld für ethnographische Studien, so wie Oberzaucher sie mit methodischer Klarheit vorgestellt hat.

Die Beiträge in *Kapitel 4* können zeigen, dass das Konzept der Ko-Konstruktion auch für die Bearbeitung von Fragestellungen in unterschiedlichen Handlungsdomänen neue Perspektiven eröffnet. Das gilt für die Fragen der interaktiven Entfaltung von Prozessen des Erwerbs von Diskurskompetenzen oder die Entwicklung des Beziehungswissens bei Kleinkindern; neue Einsichten ergeben sich für die psycholinguistische Interpretation der Voraussetzungen, die bei der Produktion von Ko-Konstruktionen bei den beteiligten Interaktanten erfüllt sein müssen; und auch die Erkenntnisse über die gemeinsame Erarbeitung von Verbalisierungen schwer formulierbarer Erlebnisse werden bereichert durch die Nutzung des Konzepts der Ko-Konstruktion in lokaler und in prozessualer Perspektive.

Dem Stichwort »Kommunikation unter erschwerten Bedingungen«, in denen »accounts« für kommunikative Probleme verstärkt beobachtbar sind, lassen sich mehrere Beiträge zuordnen: Lüdi bearbeitet Daten aus mehrsprachigen Settings, in Sacher et al. und in Gülich/Krafft werden Gesprächsausschnitte aus therapeutischen Gesprächen untersucht, Streeck wendet sich den mimisch-gestischen Aspekten von Interaktionen zwischen Babies und ihren Bezugspersonen zu. Die Erschwernis liegt jeweils im gestörten oder zumindest nicht unproblematischen Zugang zu sprachlichen Ressourcen, mit denen Sachverhalte dargestellt oder belastende Erlebnisse beschrieben werden können. In Uta Quasthoffs Arbeit ist der Grund für auftretende Schwierigkeiten hingegen in Kompetenzunterschieden zu suchen, die sich auf Diskurs- und Gattungswissen beziehen und die, wie die Gesprächsausschnitte zeigen, konstitutiv für Kind-Erwachsenen-Interaktionen sind, für die Ko-Konstruktionen eine spezifische Rolle spielen. Sie bieten einen analytischen Zugang zu den Verfahren, mit denen Kindern Kompetenzen zuerkannt werden oder mit denen sie durch die Zuweisung oder Verweigerung von konversationellen Rechten als Nicht-Member kategorisiert werden. Quasthoff kann in ihren Analysen zeigen, und in ausführlichen Kapiteln theoretisch fundieren, dass diese Verfahren einer der wesentlichen Motoren für Entwicklungsprozesse von Kindern auf dem Weg zu anerkannten Mitgliedern von Diskursgemeinschaften sind. Dies trifft auch dann zu, wenn die den Kindern zuerkannten Beteiligungsformate stark eingeschränkt werden. Eine der zentralen Schlussfolgerungen aus solchen Überlegungen ist die Bestätigung und weitere Präzisierung der Annahme soziokognitiver Ansätze, dass Erwerb und Entwicklung Ereignisse in der Interaktion sind, also in diesem weiten Sinne als Prozesse der Ko-Konstruktion von Rolle und Kompetenz verstanden werden müssen. Erst eine methodisch reflektierte Kombination aus Gesprächsanalyse und interaktionistischen Entwicklungstheorien kann derartige Untersuchungen ermöglichen und die dafür notwendigen theoretischen Grundlagen zur Verfügung stellen – genau dies leistet der Beitrag Uta Quasthoffs in Richtung weisender Stringenz.

Am Beispiel des still-face-Experiments kann Ulrich Streeck in seinem Beitrag zeigen, dass schon im vorsprachlichen Alter Babies über ein Wissen über Interaktionssequenzen verfügen, das sich nicht nur in Erwartungen über nächste Handlungen (von Seiten der Erwachsenen) manifestiert, sondern sich auch im Verhalten des Kindes, wenn erwartete nächste Handlungen ausbleiben. Routinisierte Baby-Mutter-Sequenzen können also als multimodale Ko-Konstruktionen ohne obligatorische ver-

balsprachliche Anteile beschrieben werden. Streecks Untersuchung ist daher anschlussfähig an die Beiträge im 3. Kapitel, wegen der Orientierung auf die (früh) kindliche Entwicklung aber auch an den Artikel von Quasthoff. Anders als in den gesprächsanalytischen Arbeiten formuliert er seinen Ausgangspunkt jedoch aus der Perspektive der Psychoanalyse und Psychotherapie: wie kommt es zu den oben beschriebenen Erwartungen und Verhaltensänderungen bei Kleinkindern? Psychologische Forschungen bieten dazu das Konzept des »impliziten Beziehungswissens« an, mit dem eine genetische Disposition für die Angleichung des eigenen Verhaltens an die (musterorientierten) Handlungen von Bezugspersonen beschrieben wird, die sich bereits im frühkindlichen Alter offenbart. Mit diesem Verhalten ist gleichzeitig ein Verfahren aktualisiert, mit dem das Kleinkind seine Interpretation der Beziehung zu der anwesenden Person anzeigt – ganz im Sinne der Ethnomethodologie. Die Anwendung gesprächsanalytischer Methoden ermöglicht im Streeckschen Ansatz, diese Annahme durch konkrete Datenanalysen zu plausibilisieren. Sie ist auch geeignet, der Frage nachzugehen, ob diese Erkenntnisse auf die therapeutische Beziehung zwischen Erwachsenen übertragen werden können und ob therapeutische Ereignisse das implizite Beziehungswissen verändern können. Das Ergebnis dieser Überlegungen lässt sich in dem Statement resümieren, dass das therapeutische Geschehen ko-konstruiert ist und dass in ihm die jeweiligen Interpretationen der Beziehung gegenseitig »accountable«, und damit auch veränderbar gemacht werden.

In mancher Hinsicht schließt der Beitrag von *Barbara Frank-Job* an die Ausführungen Susanne Günthners an, denn auch ihr geht es um die Frage nach den Voraussetzungen für das Zustandekommen von ko-konstruierten Äußerungen. Sie betont ebenfalls, dass die Möglichkeit der Entstehung von gemeinsam hervorgebrachten Konstruktionen nur mit sozial konventionalisierten Erwartungen, sowie dem ihnen zugrundeliegenden Diskurswissen, über situativ und pragmatisch angemessene Äußerungsformen erklärt werden kann. Dabei liegt ihr besonders daran, zwei unterschiedliche Forschungsansätze miteinander zu verbinden. Einerseits macht sie Erkenntnisse aus der (teilweise »interaktionistisch« argumentierenden) Psycholinguistik für die Erklärung des Zustandekommens von Ko-Konstruktionen nutzbar. Andererseits entwickelt sie aus der Analyse einer Kollektion von deutschen und französischen Corpusbeispielen, die sie aus experimentellen und aus alltagsweltlichen Gesprächen gewinnt, Fragestellungen zum Phänomen der gemeinsamen Hervorbringung von Äußerungen, die in der Psycholinguistik üblicherweise eine eher untergeordnete Rolle spielen. Sie konstituiert Ko-Konstruktionen auf diese Weise als transdisziplinäres Problem, dessen Bearbeitung und Lösung auf der Ebene der Untersuchung gesprochener Sprache ein aufgeklärtes Grammatikverständnis erfordert, und auf der Ebene der Modellierung kognitiver Operationen bei der Sprachproduktion die Berücksichtigung derjenigen Bedingungen, die gemeinsames (Sprach)Handeln ermöglichen. Sie exemplifiziert die Gesamtproblematik an Gesprächsdaten, in denen sie aufzeigen kann, wie Anschlüsse an Teilformulierungen von einem anderen Sprecher getätigt werden können, der dazu neben der Interpretation des bereits Geäußerten auch eine Annahme über geteiltes sprachliches und diskursives Wissen machen muss, das wegen der hohen zeitlichen Ansprüche in der konkreten Äußerungsproduktion als weitgehend routinisiert zu konzipieren ist.

*Julia Sacher, Heike Knerich und Beate Lingnau* nähern sich dem Thema Ko-Konstruktion gleichsam ex negativo. Sie suchen nämlich nicht nach Fällen von

Ko-Konstruktion, sondern nach belegbarer Abwesenheit von ko-konstruktiven Aktivitäten. Ihre Beispiele finden sie in institutionellen Settings (narratives Interview, Anamnesegespräch, Schulunterricht), in denen die Rollenverteilung jeweils einem der Partner interaktive Zurückhaltung auferlegt: Der Interviewer, der Arzt, der Schüler sollen rollengemäß dem Interviewten, dem Patienten, dem Lehrer die Initiative und das Wort überlassen. Nun gibt es aber Situationen, in denen dem zurückhaltenden Partner Aktivität abverlangt wird. Für die Verfasserinnen stellen Bewertungen eine solche Situation her, indem sie nämlich Gegenbewertungen einfordern. Unterbleiben diese, dann kann der bewertende Partner diese Abwesenheit markieren, z.B. durch Aktivitäten, die die fehlende Gegenbewertung kompensieren. Damit stellt sich ein interessantes methodisches Problem: Hat man es hier einfach mit fehlender Ko-Konstruktion zu tun, oder kann man die kompensatorischen Aktivitäten als »accounts« dafür bewerten, dass Ko-Konstruktion an dieser Stelle erwartbar und angemessen wäre?

*Elisabeth Gülich* und *Ulrich Krafft* untersuchen ein besonderes Korpus, nämlich Anamnesegespräche, in denen festgestellt werden soll, ob Anfallsranke an Epilepsie oder an einer nicht-epileptischen Anfallserkrankung leiden. In diesen Gesprächen legen sich die Ärzte äußerste kommunikative Zurückhaltung auf: Die Patienten sollen die Gesprächsführung übernehmen, ihre eigenen Relevanzen setzen und das Gespräch strukturieren. Trotz dieser Zurückhaltung kann man eine große Zahl von ko-konstruktiven Aktivitäten beobachten. Die Verfasser versuchen in einem ersten, typologisch angelegten Analyseteil eine Bestandsaufnahme dieser Ko-Konstruktionen. Im zweiten Teil werden zwei Fallbeispiele kontrastiert. Dabei zeigt sich, dass die Ärzte trotz ihrer Zurückhaltung stark an der Beschreibung der subjektiven, eigentlich kaum mitteilbaren Anfalls-Erlebnisse der Patienten beteiligt sind. Allerdings werden ihre ko-konstruktiven Angebote von den Patienten sehr unterschiedlich aufgenommen und genutzt. Diese unterschiedliche Fähigkeit zur Ko-Konstruktion korrespondiert mit anderen kommunikativen Verhaltensweisen der Patienten und kann wie diese diagnostisch genutzt werden.

Die Verfasser nutzen ihre Untersuchung, um das in Dausendschön-Gay/Gülich/Krafft (i.d.Bd.) vorgestellte »weite« Konzept von Ko-Konstruktion zu erproben. Sie schlagen zwei Präzisierungen vor: Ko-Konstruktion muss als ein graduelles Phänomen begriffen werden, zwischen »maximaler« Ko-Konstruktion, in der beide Partner an Formulierung und Ausarbeitung der Inhalte gleichen Anteil haben, und einem unklaren Randbereich, in dem schwer zu entscheiden ist, ob überhaupt eine Ko-Konstruktion vorliegt. Weiterhin schlagen sie vor, zwischen gelingenden und misslingenden Ko-Konstruktionen zu unterscheiden. Ko-Konstruktionen finden dort statt, wenn ein Ko-Konstruktionsangebot angenommen und erfolgreich umgesetzt wird.

Die in diesem Band entwickelten Analysen und Interpretationen verstehen die Herausgeber als den möglichen Beginn einer intensiveren Beschäftigung mit Ko-Konstruktionen in einem erweiterten, transdisziplinären Zusammenhang. Wir hoffen, auch andere Forscherinnen und Forscher für diesen erweiterten Ansatz zu interessieren und ihre Arbeiten für die Entwicklung dieser neuen Perspektive anzuregen.

Bielefeld, im August 2015

## LITERATUR

- Dausendschön-Gay, Ulrich/Gülich, Elisabeth/Krafft, Ulrich (1992): »Gemeinsam schreiben. Konversationelle Schreibinteraktionen zwischen deutschen und französischen Gesprächspartnern«, in: Hans P. Krings/Gerd Antos (Hg.), Textproduktion. Neue Wege der Forschung, Trier: Wissenschaftlicher Verlag, S. 219-255.
- Dausendschön-Gay, Ulrich/Krafft, Ulrich (1994): »Analyse conversationnelle et recherche sur l'acquisition«, in: Bernard Py (Hg.): L'acquisition d'une langue seconde. Quelques développements théoriques récents = Bulletin suisse de linguistique appliquée 59, S. 127-158.
- Gülich, Elisabeth (1986): »L'organisation conversationnelle des énoncés inachevés et de leur achèvement interactif en »situation de contact««, in: DRLAV Revue de Linguistique 34-35, S. 161-182.
- Krafft, Ulrich/Dausendschön-Gay, Ulrich (1999): »Système écrivant et processus de mise en mots dans les rédactions conversationnelles«, in: Langages 134 (Themenheft »Interaction et langue étrangère«), S. 51-67.
- Krafft, Ulrich (2005): »La matérialité de la production écrite: les objets intermédiaires dans la rédaction coopérative de Paulo et Maïté«, in: Robert Bouchard/Lorenza Mondada (Hg.), Les processus de la rédaction collaborative, Paris: L'Harmattan, S. 55-90.
